# Supplementary material
Source: ML conference proceedings conference paper supplement (https://aclanthology.org/P19-1524)

... (1,3,ORG)  $\longleftrightarrow$  (4,4,0)  $\longleftrightarrow$  (5,5,0) ... Semi-CRF

Segment  
Score

Token-level  
Representation

Soft Dictionary  
Lookup

BiLSTM Layer

GloVe  
CNN Char-enc  
ELMo

Scottish

Labour

Party

narrowly

backs

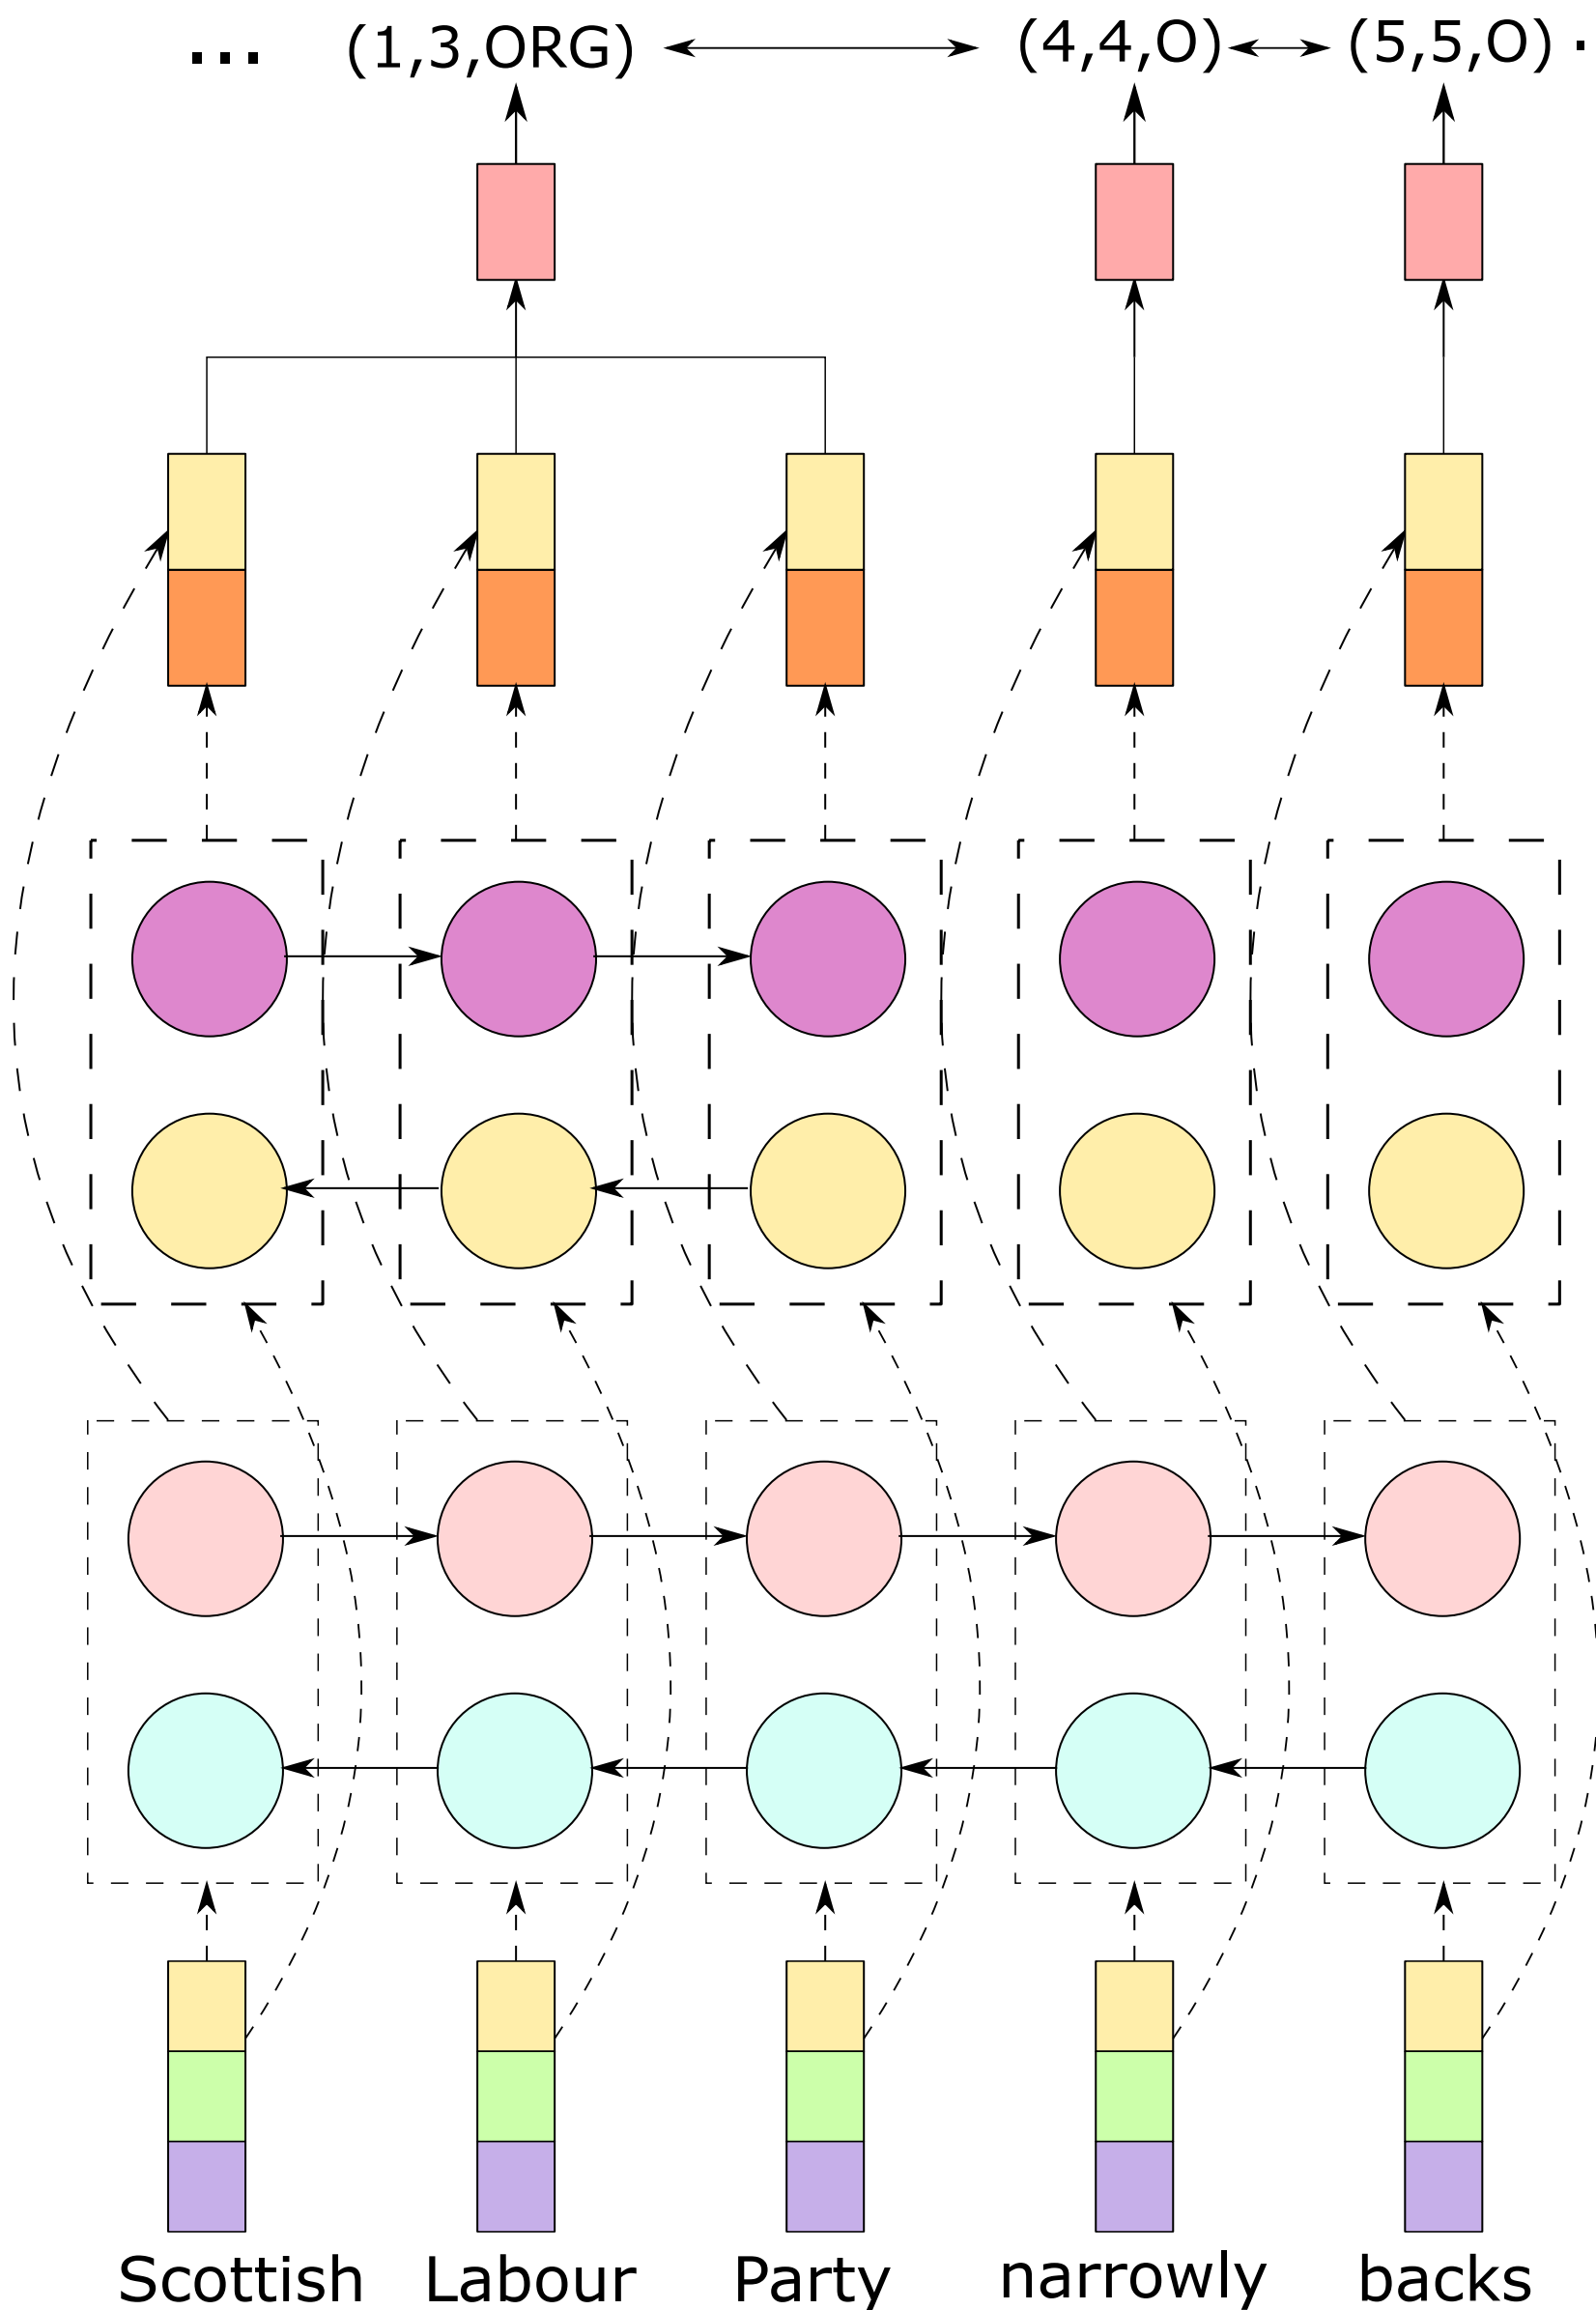

Supplement: Supplementary [file P19-1524.Supplementary.zip]
